# Supplementary material for: Bioinspired NiFe–gallate metal–organic frameworks for highly efficient oxygen evolution electrocatalysis
Source: Royal Society of Chemistry journal article supplement (doi:10.1039/d2ta01293f), 2022-01-01
Supplement: d2ta01293f1.pdf [file d2ta01293f1.pdf]

## Supporting Information

### Bioinspired NiFe-Gallate Metal–Organic Frameworks for Highly Efficient Oxygen Evolution Electrocatalysis

Min Fang,<sup>‡, †</sup> Xutao Gao,<sup>‡, §</sup> Jing Liang,<sup>‡, †</sup> Biao Guo,<sup>†</sup> Lie Zou,<sup>†</sup> Jun Lu,<sup>†</sup> Yan Gao,<sup>†</sup> Edmund C. M. Tse<sup>\*, §, #</sup> and Jinxuan Liu<sup>\*, †</sup>

<sup>†</sup> State Key Laboratory of Fine Chemicals, Dalian University of Technology, 116024 Dalian, China.

<sup>§</sup> Department of Chemistry, HKU-CAS Joint Laboratory on New Materials, University of Hong Kong, Hong Kong SAR, China.

<sup>#</sup> HKU Zhejiang Institute of Research and Innovation, 311305 Hangzhou, China.

<sup>‡</sup> These authors contributed equally to this work.

<sup>\*</sup> **Jinxuan Liu** - State Key Laboratory of Fine Chemicals, Dalian University of Technology, 116024 Dalian, China.

E-mail: [jinxuan.liu@dlut.edu.cn](mailto:jinxuan.liu@dlut.edu.cn)

<sup>\*</sup> **Edmund C. M. Tse** - Department of Chemistry, HKU-CAS Joint Laboratory on New Materials, University of Hong Kong, Hong Kong SAR, China.

Email: [ecmtse@hku.hk](mailto:ecmtse@hku.hk)

## Experimental Details

### Chemicals and Materials

Potassium hydroxide (KOH, 95%), nickel chloride hexahydrate ( $\text{NiCl}_2 \cdot 6\text{H}_2\text{O}$ , 99.9%), and gallic acid monohydrate (GA, 98%) were purchased from Aladdin. Iron (II) chloride tetrahydrate ( $\text{FeCl}_2 \cdot 4\text{H}_2\text{O}$ , 99.95%) was purchased from Macklin. A customized laboratory water purification system was used to purify deionized (DI) water ( $18.2 \text{ } \Omega\text{M}\cdot\text{cm}$  at  $25 \text{ } ^\circ\text{C}$ ). All the above reagents and chemicals were used without further purification in all experiments.

### Synthesis of Ni-GA, Fe-GA, and NiFe-GA

The catalysts were prepared by a one-step hydrothermal method. A piece of carbon paper (CP) (area:  $2 \times 2 \text{ cm}^2$ ; thickness:  $0.28 \text{ mm}$ ) was soaked sequentially in  $1 \text{ M HCl}$ , acetone, DI water, and absolute ethanol for 30 minutes under ultrasonic conditions. Then, the CP was kept in a vacuum drying oven at  $60 \text{ } ^\circ\text{C}$  for 8 h. Ni-GA, Fe-GA, and NiFe-GA were synthesized using a previously reported method with slight modifications.<sup>1, 2</sup> Typically, gallic acid monohydrate ( $\text{H}_4\text{gal}$ , 4 mmol) was dissolved in a KOH aqueous solution (5 mL, 0.16 M), and nickel chloride hexahydrate ( $\text{NiCl}_2 \cdot 6\text{H}_2\text{O}$ ,  $x \text{ mmol}$ ,  $x=2, 1.75$  and 0) and iron (II) chloride tetrahydrate ( $\text{FeCl}_2 \cdot 4\text{H}_2\text{O}$ ,  $y \text{ mmol}$ ,  $y=0, 0.25$ , and 2) were dissolved in a KOH aqueous solution (2.5 mL, 0.16 M), respectively. After ultrasonic treatment for 30 min, the mixture was transferred into a 15 mL stainless steel autoclave lined with Teflon. The CP (area:  $2 \times 2 \text{ cm}^2$ ; thickness:  $0.28 \text{ mm}$ ) was vertically placed into the autoclave. Then, the autoclave was sealed and kept at  $120 \text{ } ^\circ\text{C}$  for 24 h. After that, the autoclave was naturally cooled down to room temperature. The CP was taken out from the autoclave carefully and rinsed with deionized water and ethanol to remove weakly adsorbed catalysts and

impurities. Finally, the obtained samples were kept at 60 °C under vacuum for 12 h.

### **Materials Characterization**

X-ray diffractometer (XRD, Rigaku Rotaflex, Japan) with CuK $\alpha$  radiation ( $\lambda$  = 1.5418 nm, 40 kV, 40 mA) was used to record crystallographic information of the catalyst. FTIR spectrometer (Bruker VERTEX 80v) with a narrow band mercury cadmium telluride (MCT) detector was used to obtain important information on the functional groups on the catalyst. Field emission scanning electron microscope (SEM, FEI Nova Nano SEM 450) and transmission electron microscope (TEM, FEI TF30) were used to identify the morphology and map the elemental distribution across the surface of the catalyst. X-ray photon energy spectroscopy (XPS, Thermo VG ESCALAB250) was used to determine the redox state of the sample surface. Raman spectra were recorded using LabRam HR spectrometer (Horiba Jobin Yvon) with a 50X objective microscope. The excitation line was 638 nm with a power of 2.4 mW.

### **Electrocatalytic Test**

All electrochemical tests were performed on an electrochemical workstation (CHI760E, Shanghai, China) at room temperature in a traditional three-electrode system using a Pt wire ( $\Phi$  = 1 mm) as the counter electrode, the as-prepared catalysts and blank CP (effective geometric area: 1  $\times$  1 cm<sup>2</sup>) as the working electrode, and a Hg/HgO electrode as the reference electrode. 1 M KOH was used as the electrolyte for all electrochemical tests.

### **Cyclic Voltammetry (CV) Measurements**

CV experiments were performed in the range of 0.9 - 1.9 V vs. RHE at a scan rate of 50 mV s<sup>-1</sup>. The working electrodes used for all CV experiments in this work were CP, Ni-GA-CP, Fe-GA-CP, and NiFe-GA-CP, respectively.

### **Linear Sweep Voltammetry (LSV) Measurements**

LSV measurement setting conditions were similar to CV test with 90% iR compensation. High-potential to low-potential reverse scan method with a lower scan rate (5 mV·s<sup>-1</sup>) was used to obtain an accurate curve without the interference of oxidation peaks.

### **Electrochemical Active Surface Area (ECSA) Measurements**

CVs at different scan rates from 20 to 120 mV·s<sup>-1</sup> in the potential range of 0.8 - 0.9 V (vs. RHE) were performed to evaluate the electrochemical active surface area (ECSA) of the as-prepared electrocatalysts. By obtaining capacitive currents ( $J_{\text{anodic}} - J_{\text{cathodic}}$ ) at 0.85 V (vs. RHE), the double-layer capacitance ( $C_{\text{dl}}$ ) is equal to half of the slope.

### **Stability Tests**

Chronopotentiometry (CP) was used to evaluate the stability of the electrocatalysts at 50 mA·cm<sup>-2</sup> and 100 mA·cm<sup>-2</sup> (without iR correction). All the potentials versus Hg/HgO were converted to the reversible hydrogen electrode (RHE) by the Nernst equation ( $E_{\text{RHE}} = E_{\text{Hg/HgO}} + 0.098 + 0.059\text{pH}$ ), and the overpotential of OER was calculated by the equation:  $\eta = E_{\text{RHE}} - 1.23$  and Tafel slopes were calculated with the equation:  $\eta = b \log j + a$  where  $\eta$  represents the overpotential,  $b$  represents the Tafel slope,  $j$  represents the current density, and  $a$  is the constant.

## Computational Methods

The initial Ni-GA and Fe-GA structures were taken from previous literature.<sup>3</sup> The NiFe-GA structure was constructed by expanding the Ni-GA structure twice and replacing one Ni atom with a Fe atom. Spin-polarized density functional theory (DFT) calculations were performed to optimize the cell shape and the atomic positions of the structure by Vienna *ab initio* simulation package (VASP)<sup>4</sup> using the projector augmented wave (PAW) potentials with a planewave cutoff energy of 450 eV.<sup>5, 6</sup> The generalized gradient approximation (GGA) functional of Perdew, Burke, and Ernzerhof (PBE) was applied as the exchange-correlation functional<sup>7</sup> with Grimme's semiempirical DFT-D3 dispersion correction to describe the van der Waals (vdW) interactions.<sup>8</sup> To better describe the localized d-electrons of Fe and Ni in GA-MOF structures, the DFT+U approach was utilized with  $U_{\text{Fe}} = 5.3$  and  $U_{\text{Ni}} = 6.45$ , respectively.<sup>9</sup> The convergence criteria of electronic energies and atomic forces for all calculations were  $10^{-5}$  eV and 0.03 eV/Å. For NiFe-GA calculations, Brillouin-zone integrations were performed with a  $4 \times 4 \times 4$  Gamma k-point mesh grid for the bulk structure. To study surface reactions, the most exposed (100) plane was constructed for the adsorption of intermediates, which is consistent with XRD results. A vacuum region of 15 Å was added to the surface to eliminate the effects between two adjacent layers. The (100) plane of Fe-GA, Ni-GA, and NiFe-GA were geometry-optimized by DFT calculation to obtain a stable surface structure. Subsequently, the \*O, \*OH, and \*OOH absorbed intermediates were optimized by DFT calculation to obtain the energy of each structure. For surface property calculations, half of the bottom layers were fixed at their bulk positions using a  $3 \times 3 \times 1$  Gamma k-point grid. The ZPE and

entropy corrections were performed through frequency calculations.

OER overpotential was evaluated by the Nørskov's model<sup>10</sup> with the following steps:

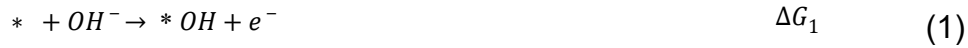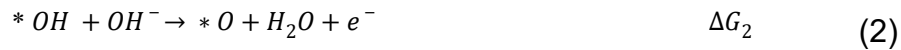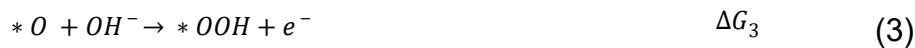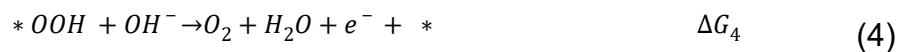

where \* represents an adsorption active site on the surface of the catalyst, while \*OH, \*O, and \*OOH denote oxygen intermediates. For each step i, the Gibbs free energy  $\Delta G_i$  can be calculated using:

$$\Delta G_i = \Delta E + \Delta ZPE - T\Delta S + Ue + \Delta G_{pH} \quad (5)$$

where  $\Delta E$  is the reaction energy difference between the reactants and the products,  $\Delta ZPE$  is the zero-point energy,  $\Delta S$  is the entropy change,  $T$  represents the finite temperature,  $e$  is the charge transferred,  $U$  is the applied potential, and  $\Delta G_{pH}$  is considered as the correction free energy of  $H^+$ .

The overpotential  $\eta$  is computed as:

$$\eta = \max \{ \Delta G_1, \Delta G_2, \Delta G_3, \Delta G_4 \} / e - 1.23 eV \quad (6)$$

## Figures and Tables

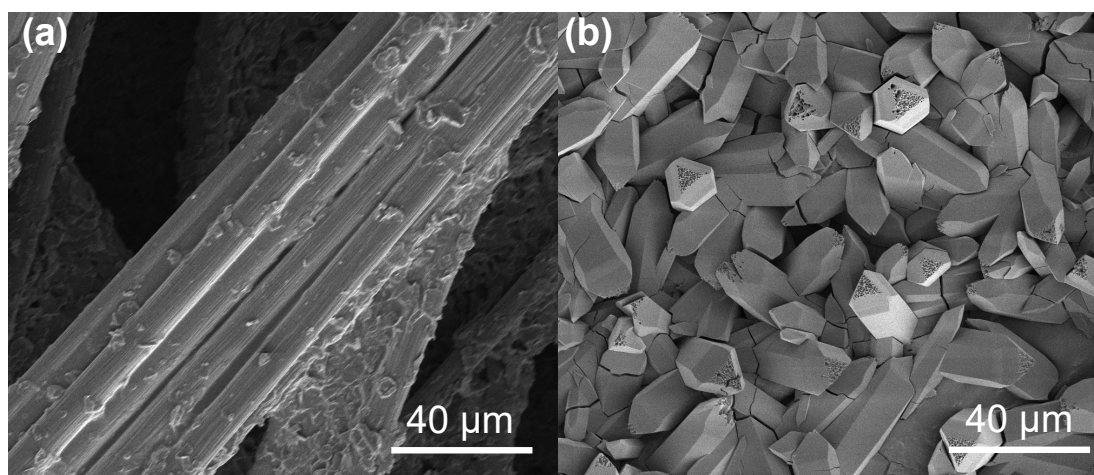

**Figure S1.** SEM images of (a) carbon paper and (b) NiFe-GA-CP.

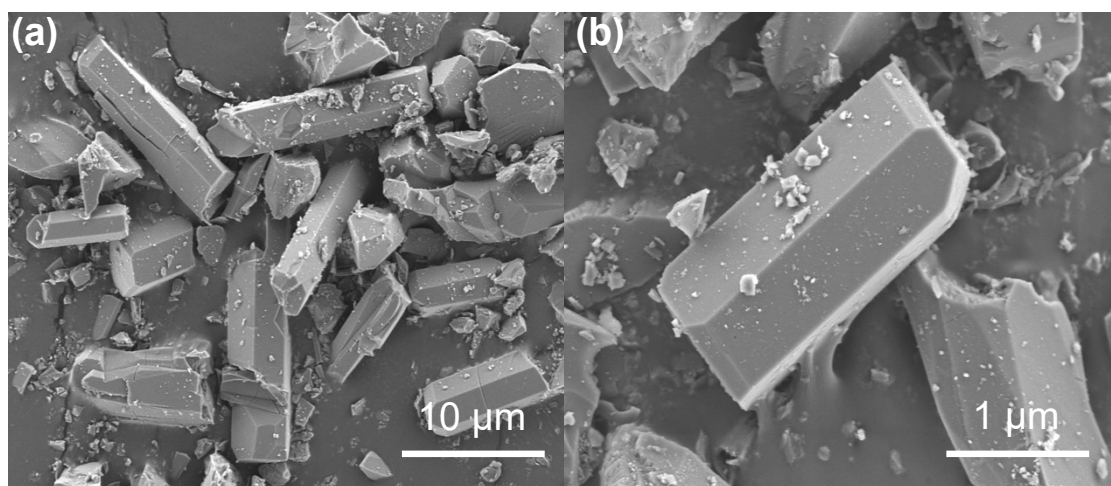

**Figure S2.** SEM images of NiFe-GA powder at different magnifications.

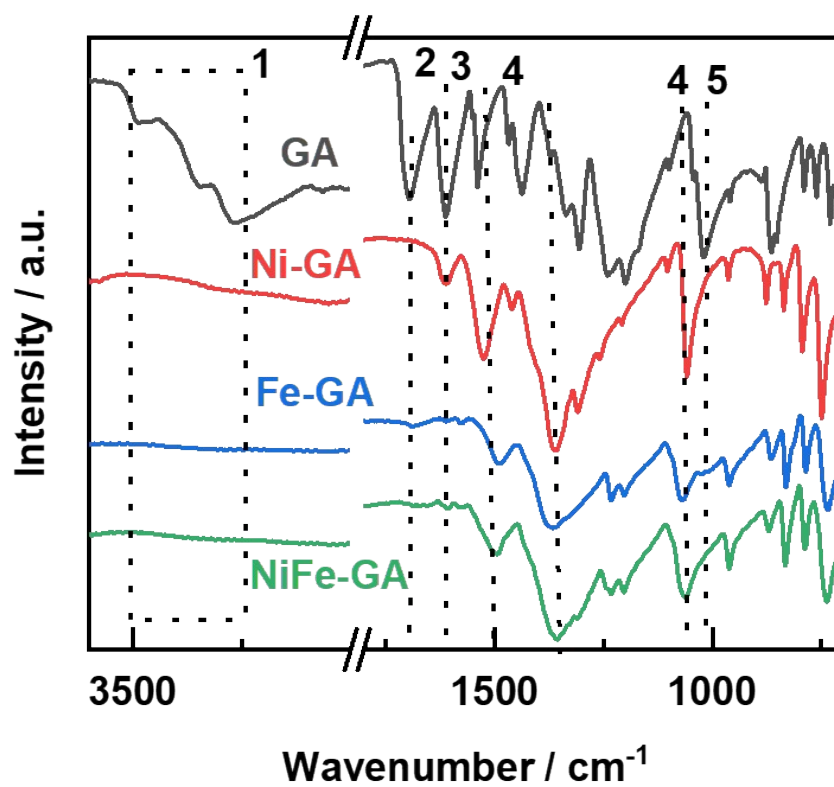

**Figure S3.** IR spectra of Ni-GA (red), Fe-GA (blue), NiFe-GA (green) and GA (black). The band assignments are listed in **Table S2**.

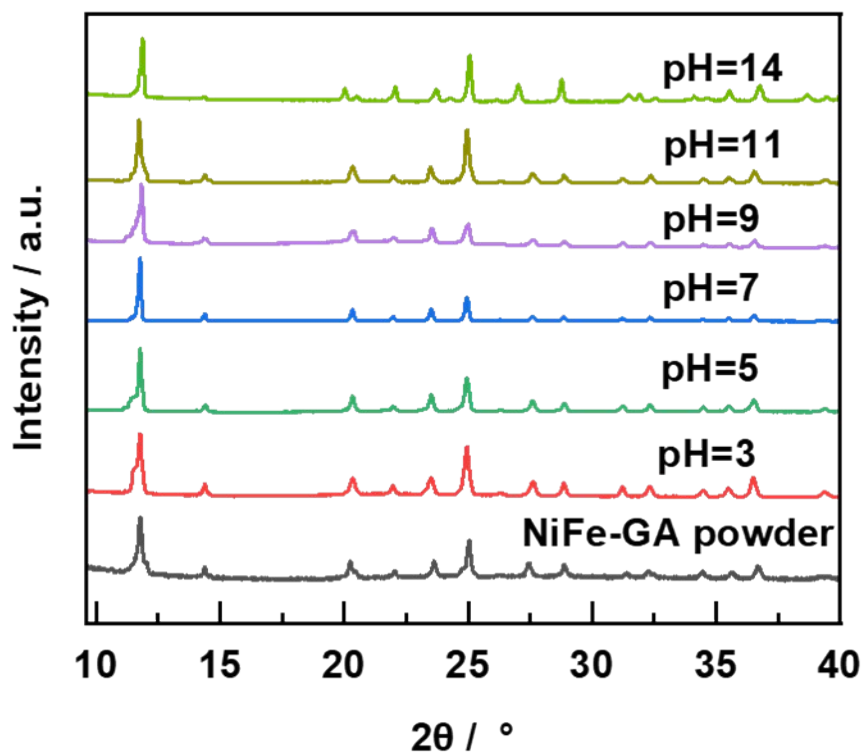

**Figure S4.** XRD patterns of NiFe-GA, with the as-synthesized catalyst immersed in aqueous solution of different pH values at room temperature for 24 h (HCl solution for pH=3/5, deionized water for pH=7, KOH solution for pH=9/11/14).

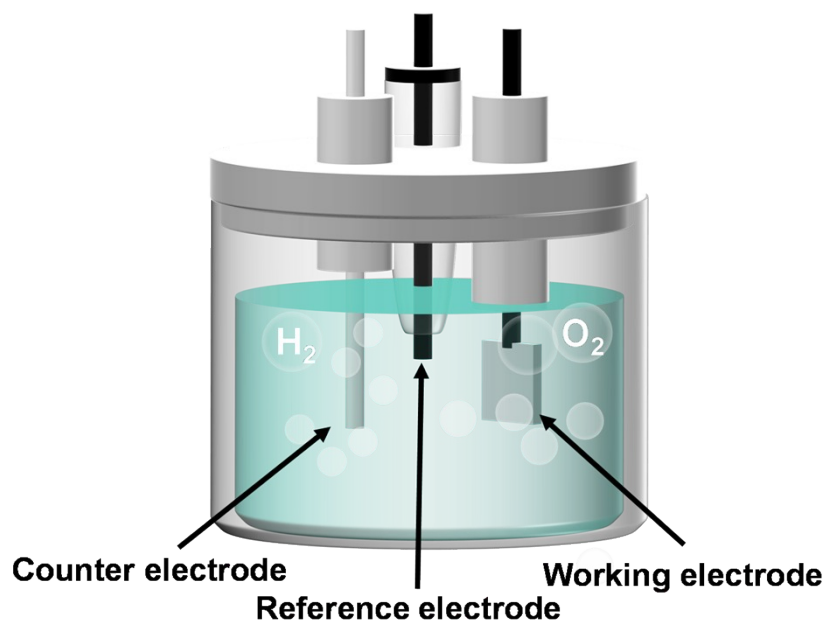

**Figure S5.** A standard three-electrode electrochemical cell: working electrode (modified CP); reference electrode (Hg/HgO); counter electrode (platinum wire).

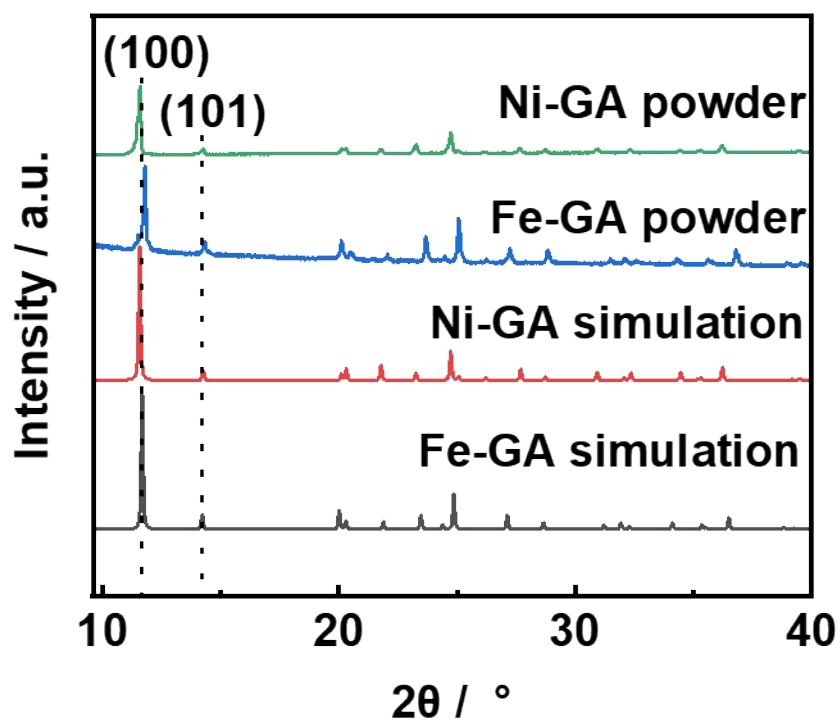

**Figure S6.** PXRD patterns of Fe-GA (blue) and Ni-GA (green). Simulated PXRD patterns of Fe-GA (black) and Ni-GA (red).

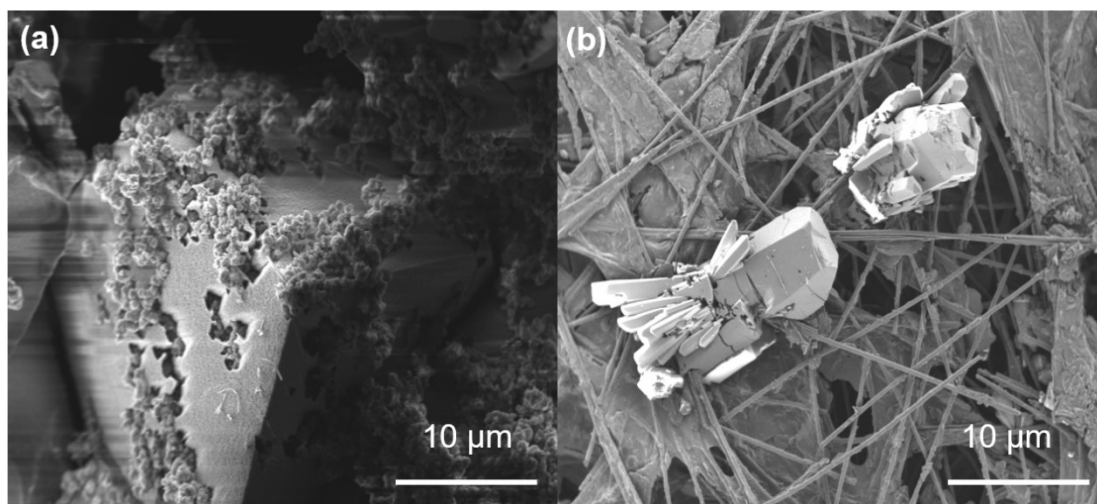

**Figure S7.** SEM images of (a) Ni-GA-CP and (b) Fe-GA-CP.

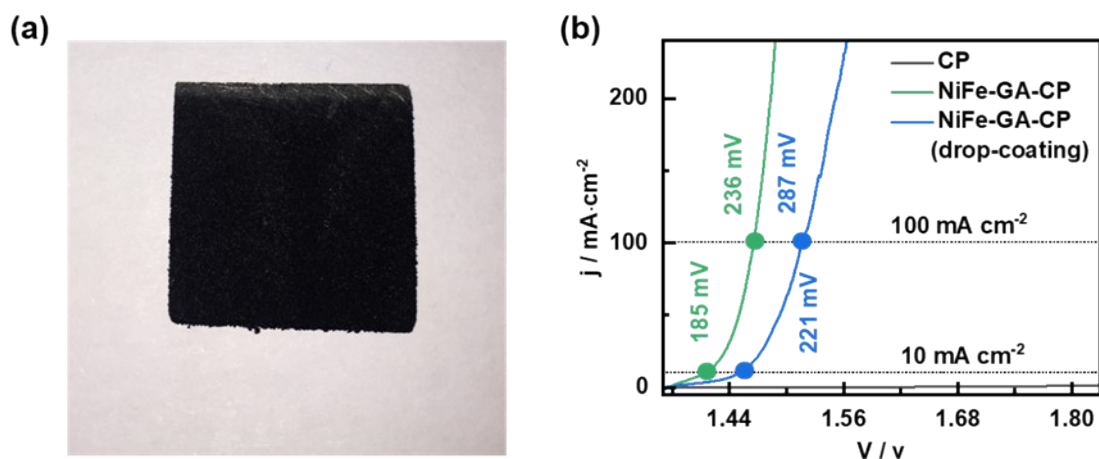

**Figure S8.** (a) As-prepared electrode by one-pot hydrothermal method; (b) LSV curves of the CP, NiFe-GA-CP and NiFe-GA-CP (drop-coating) in 1 M KOH. Potentials are reported versus RHE (RHE = reversible hydrogen electrode).

The NiFe-GA-CP (drop-coating) was prepared by drop-coating the ink containing Nafion solution and powder NiFe-GA ( $\sim 11 \text{ mg} \cdot \text{cm}^{-2}$ ) on carbon paper. The NiFe-GA-CP (drop-coating) gives to the overpotentials of 221 mV at  $j = 10 \text{ mA} \cdot \text{cm}^{-2}$  and 287 mV at  $j = 100 \text{ mA} \cdot \text{cm}^{-2}$ , which is worse than the OER performance of NiFe-GA-CP (solvothetical) with the overpotentials of 185 and 236 mV at the current densities of 10 and  $100 \text{ mA} \cdot \text{cm}^{-2}$ , respectively. We attributed the superior OER performance of NiFe-GA-CP (solvothetical) to the strong coupling effect between the catalytic material and the substrate.

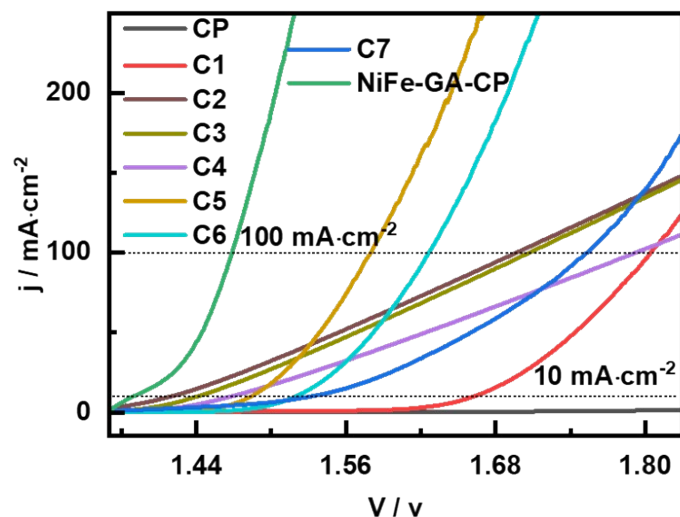

**Figure S9.** LSV curves of the CP, NiFe-GA-CP and the other reference samples of  $\text{Ni}_x\text{Fe}_{2-x}\text{-GA-CP}$  (C1: Fe-GA-CP; C2:  $\text{Ni}_{1.5}\text{Fe}_{0.5}\text{-GA-CP}$ ; C3:  $\text{Ni}_{1.25}\text{Fe}_{0.75}\text{-GA-CP}$ ; C4:  $\text{Ni}_1\text{Fe}_1\text{-GA-CP}$ ; C5:  $\text{Ni}_{0.5}\text{Fe}_{1.5}\text{-GA-CP}$ ; C6:  $\text{Ni}_{0.25}\text{Fe}_{1.75}\text{-GA-CP}$ ; C7: Ni-GA-CP) in 1 M KOH. Potentials are reported versus RHE (RHE = reversible hydrogen electrode).

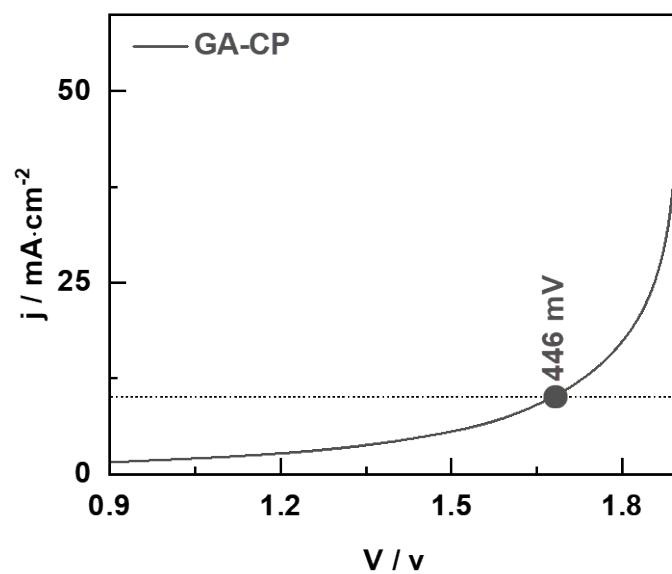

**Figure S10** LSV curve of the GA-CP, in 1 M KOH. Potentials are reported versus RHE (RHE = reversible hydrogen electrode).

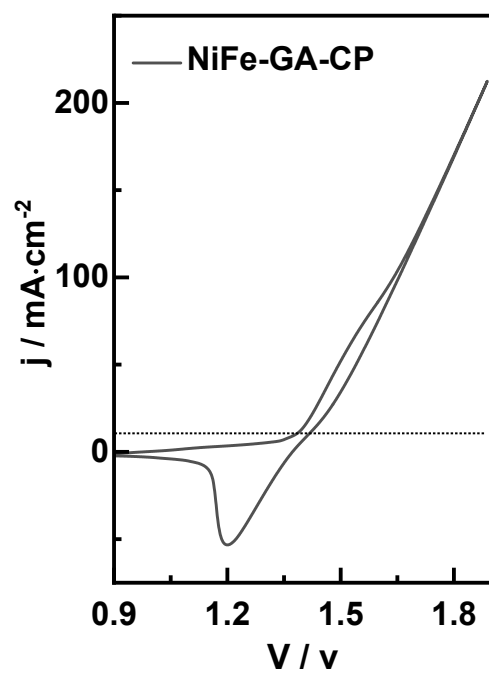

**Figure S11.** Cyclic voltammogram of NiFe-GA-CP in 1 M KOH at a scan rate of 5 mV·s<sup>-1</sup>.

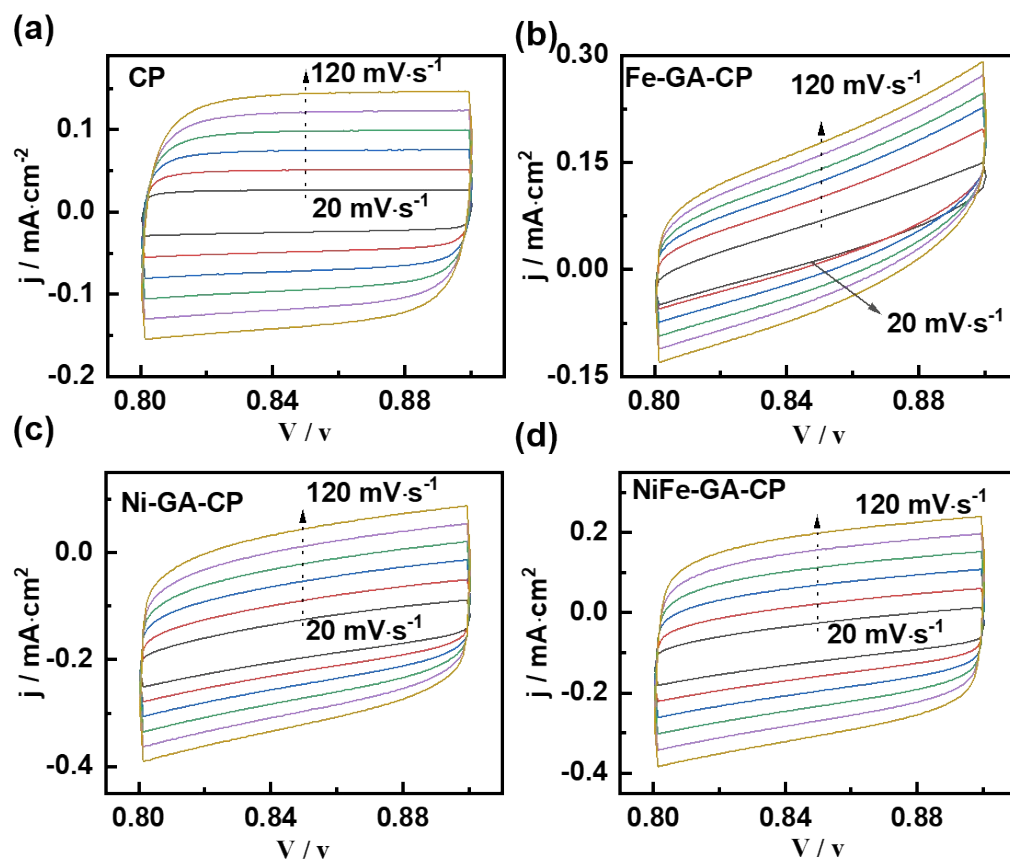

**Figure S12.** CV curves of (a) CP, (b) Fe-GA-CP, (c) Ni-GA-CP, and (d) NiFe-GA-CP (with varying scan rates: 20, 40, 60, 80, 100 and 120  $\text{mV} \cdot \text{s}^{-1}$ ) in 1 M KOH.

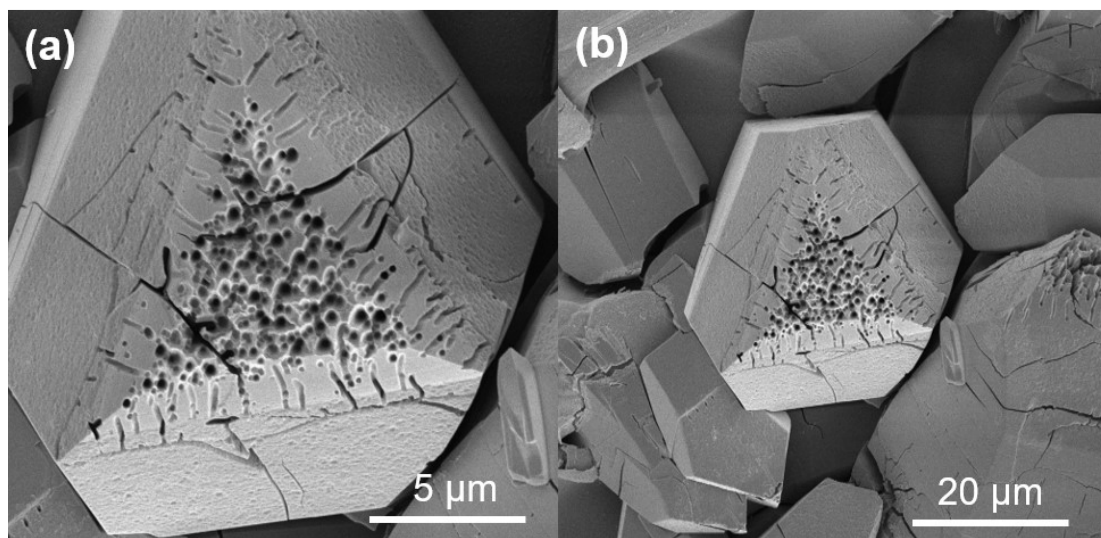

**Figure S13.** SEM images of NiFe-GA-CP after OER test at different magnifications.

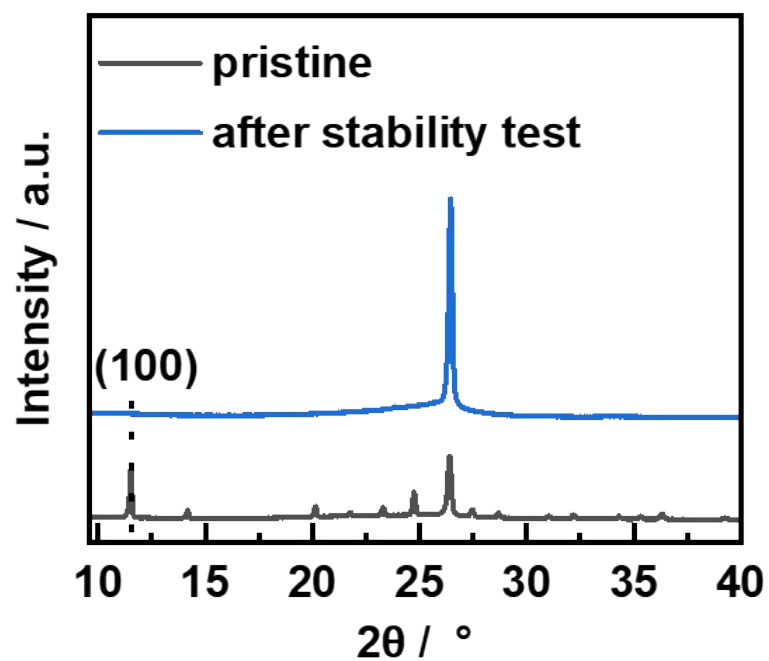

**Figure S14.** XRD pattern of NiFe-GA-CP before (black) and after (blue) stability test.

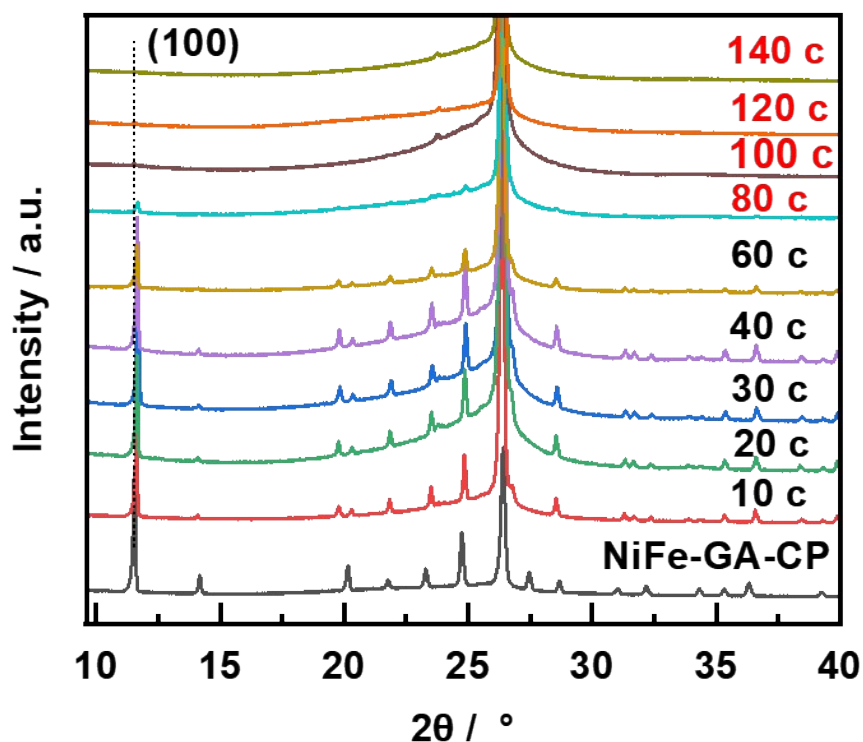

**Figure S15.** XRD patterns of NiFe-GA-CP and after different CV cycles in 1M KOH solution (CV: the range of 0.9 - 1.9 V vs. RHE at a scan rate of 50 mV s<sup>-1</sup>).

In order to confirm whether OER performance originates from pristine NiFe-GA-CP or the reconstructed material, we have characterized the XRD patterns of NiFe-GA-CP with various CV cycles as show in **Figure S5**. Within 60 CV cycles, the crystalline structure of NiFe-GA-CP is remained, and the intensity of the (100) peak has a significant drop at 80 CV cycles, implying the occurrence of reconstruction of NiFe-GA-CP. This peak completely vanished when the CV cycles up to 140, indicating the transformation of NiFe-GA-CP into an amorphous ultrathin two-dimensional oxyhydroxide.

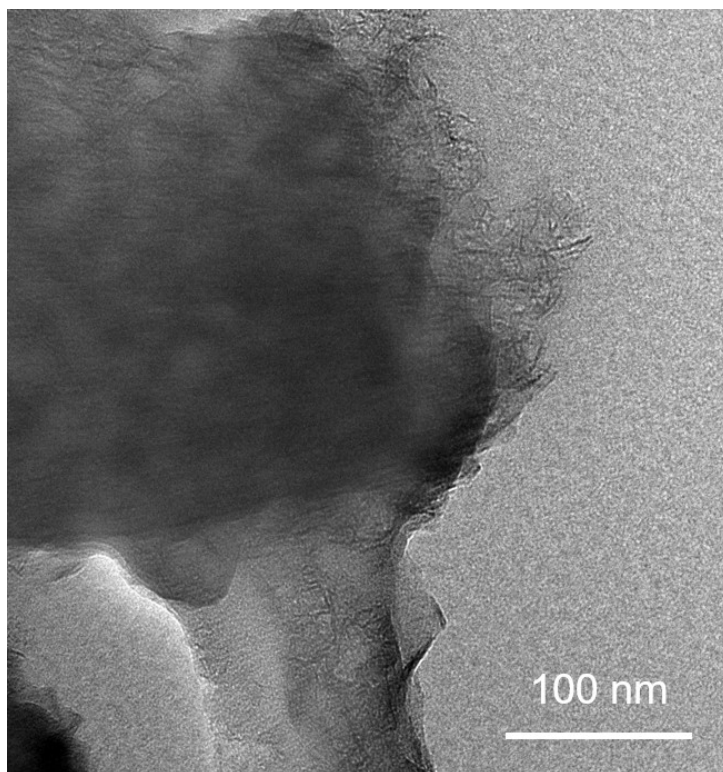

**Figure S16.** TEM image of NiFe-GA-CP after stability test.

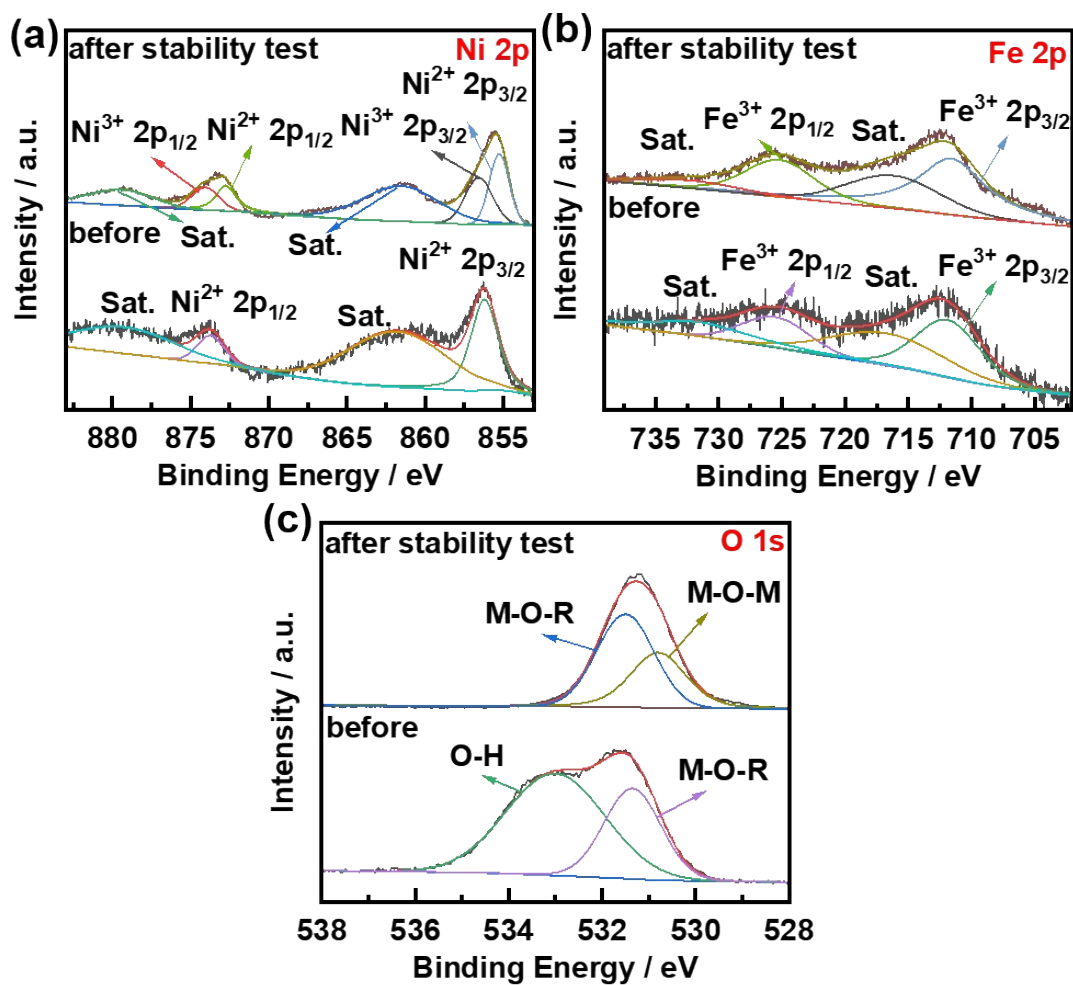

**Figure S17.** XPS spectra of NiFe-GA-CP before and after durability tests. (a) Ni 2p region; (b) Fe 2p region; and (c) O 1s region.

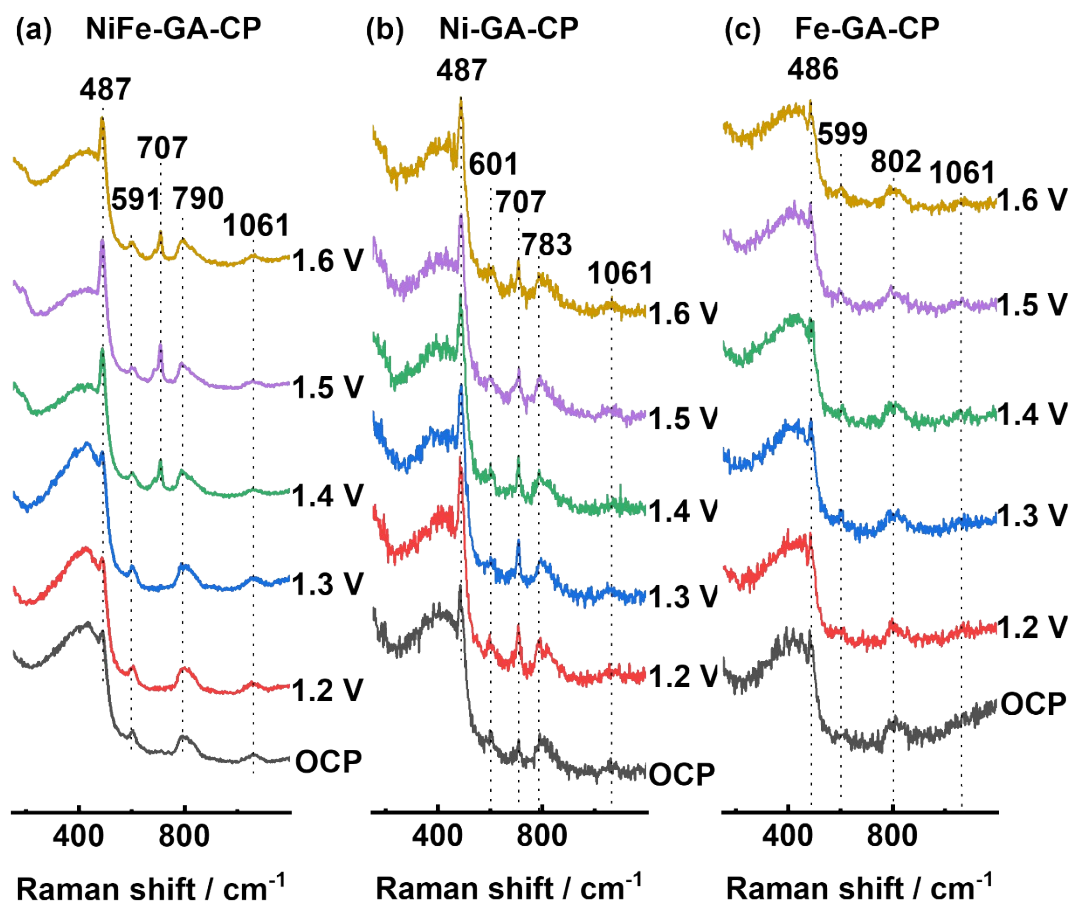

**Figure S18.** In-situ Raman spectra of (a) NiFe-GA-CP; (b) Ni-GA-CP; (c) Fe-GA-CP recorded at varied potentials during OER in 1 M KOH. OCP: open circuit potential.

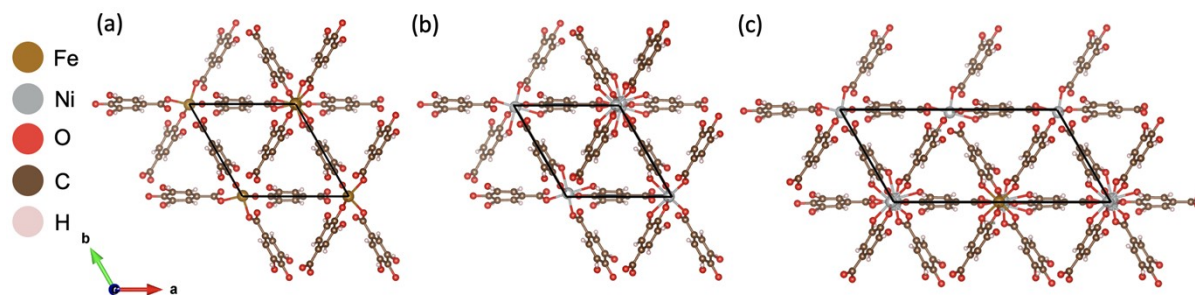

**Figure S19.** DFT optimized bulk structure of (a) Fe-GA (with lattice parameters of ( $a = 9.1 \text{ \AA}$ ,  $b = 9.1 \text{ \AA}$ ,  $c = 9.9 \text{ \AA}$ ,  $\alpha = 90^\circ$ ,  $\beta = 90^\circ$ ,  $\gamma = 120^\circ$  )); (b) Ni-GA (with lattice parameters of ( $a = 8.8 \text{ \AA}$ ,  $b = 8.8 \text{ \AA}$ ,  $c = 10.2 \text{ \AA}$ ,  $\alpha = 89^\circ$ ,  $\beta = 90^\circ$ ,  $\gamma = 120^\circ$  )); and NiFe-GA (with lattice parameters of ( $a = 17.8 \text{ \AA}$ ,  $b = 8.8 \text{ \AA}$ ,  $c = 10.2 \text{ \AA}$ ,  $\alpha = 89^\circ$ ,  $\beta = 90^\circ$ ,  $\gamma = 120^\circ$  ))).

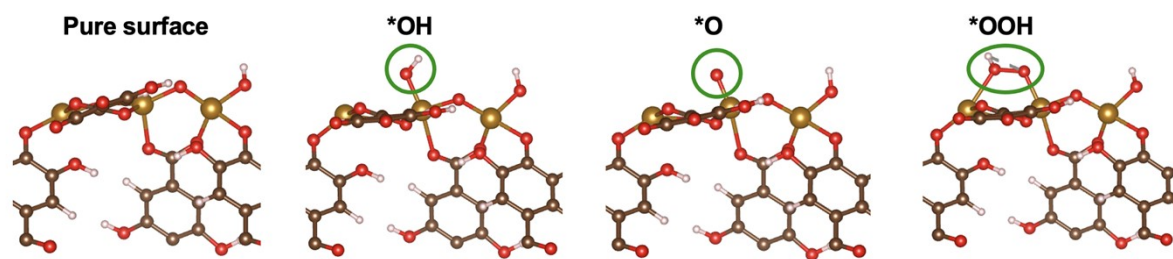

**Figure S20.** Optimized adsorption configurations of OER intermediates on the (100) surface of Fe-GA.

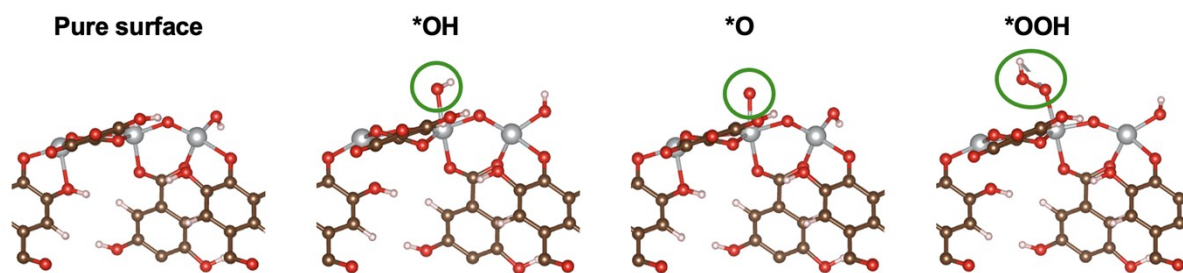

**Figure S21.** Optimized adsorption configurations of OER intermediates on the (100) surface of Ni-GA.

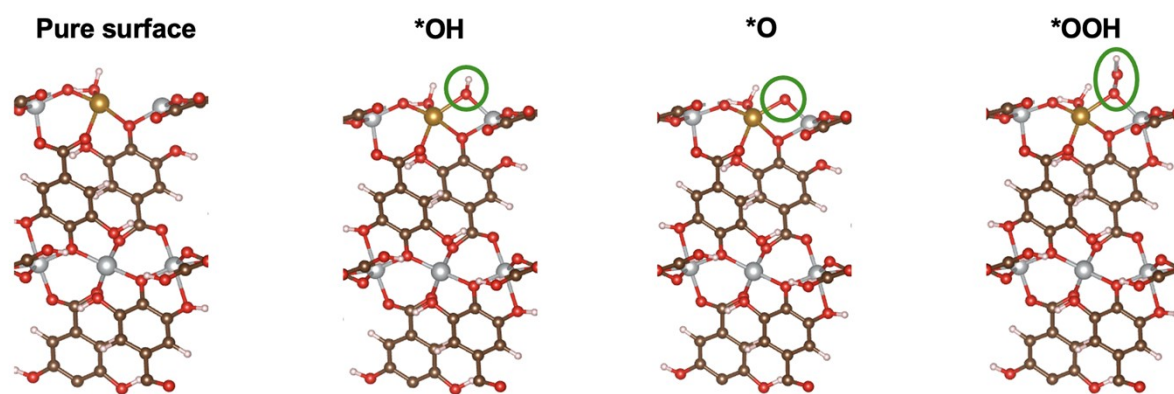

**Figure S22.** Optimized adsorption configurations of OER intermediates on the (100) surface of NiFe-GA.

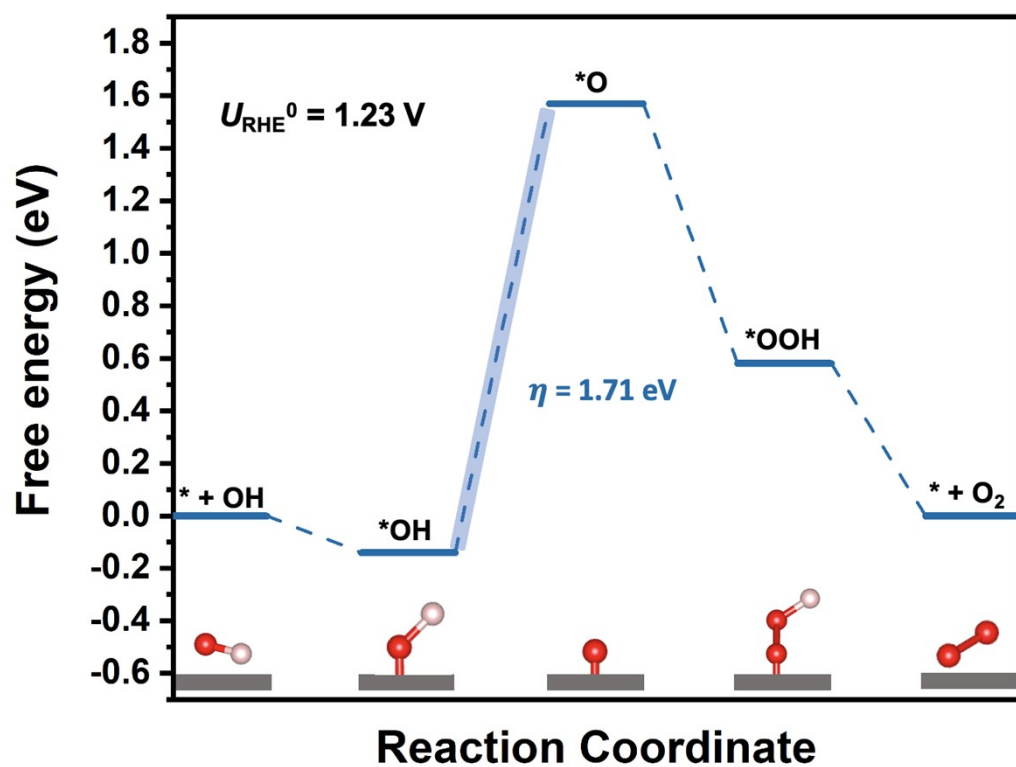

**Figure S23.** Calculated free energy diagram of the OER process on Fe-GA.

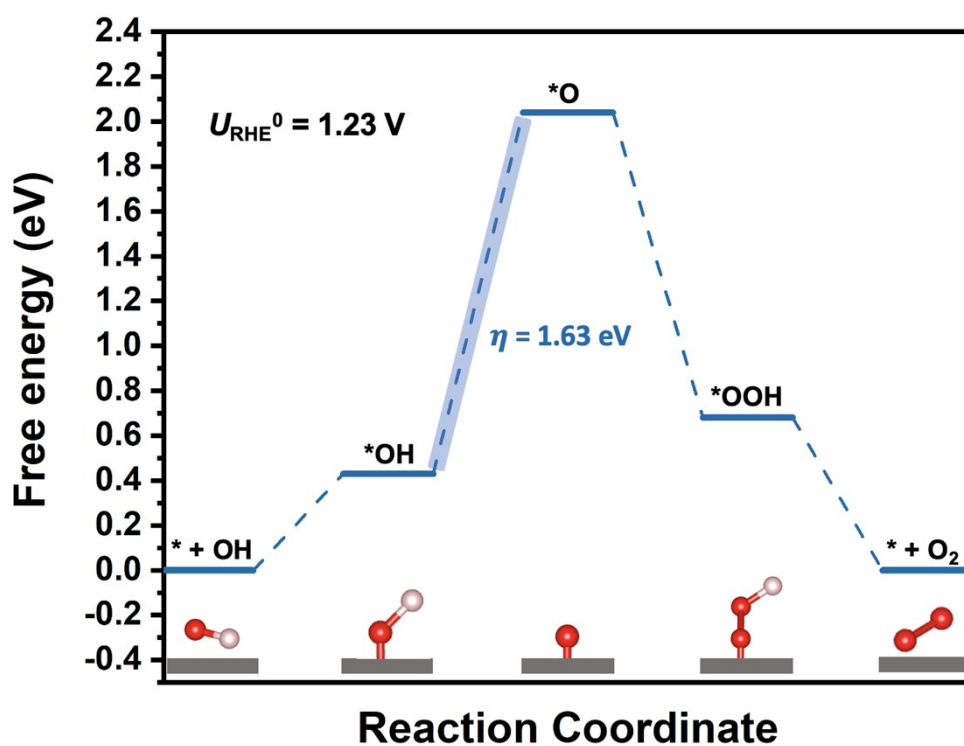

Figure S24. Calculated free energy diagram of the OER process on Ni-GA.

**Table S1.** EDS and ICP results of NiFe-GA MOF.

|     | Element | Weight % | Atom % | Concentration /<br>mg·L <sup>-1</sup> | Ni : Fe |
|-----|---------|----------|--------|---------------------------------------|---------|
| EDS | Fe      | 4.58     | 1.35   |                                       | ~ 3:1   |
|     | Ni      | 13.08    | 3.67   |                                       |         |
| ICP | Fe      |          |        | 11.71                                 | ~ 3:1   |
|     | Ni      |          |        | 28.89                                 |         |

**Table S2.** IR band assignments of Ni-GA, Fe-GA, NiFe-GA and GA.<sup>11</sup>

|   | Wavenumber / cm <sup>-1</sup> | Assignment     | Group |
|---|-------------------------------|----------------|-------|
| 1 | 3500~3200                     | $\nu$ O-H      | -OH   |
| 2 | 1695                          | $\nu$ C=O      | -COOH |
| 3 | 1614                          | $\nu$ C=O      | -CO-  |
| 4 | 1503                          | $\nu_{as}$ C=O | -COO- |
| 5 | 1360                          | $\nu_s$ C=O    | -COO- |
| 6 | 1063                          | $\nu$ C-O      | R-O-  |
| 7 | 1017                          | $\nu$ C-O      | R-OH  |

**Table S3.** Catalyst concentrations of NiFe-GA, Fe-GA, and Ni-GA on CP.

| Catalyst   | Concentration / $\text{mg}\cdot\text{cm}^{-2}$ |
|------------|------------------------------------------------|
| NiFe-GA-CP | 11.44                                          |
| Fe-GA-CP   | 11.25                                          |
| Ni-GA-CP   | 11.30                                          |

**Table S4.** Comparison of the OER performance among NiFe-GA-CP and other electrocatalysts on carbon paper.

| Catalyst                                                | Substrate | $j$ (mA·cm <sup>-2</sup> ) | $\eta$ (mV) | Tafel slope (mV·dec <sup>-1</sup> ) | Ref.      |
|---------------------------------------------------------|-----------|----------------------------|-------------|-------------------------------------|-----------|
| NiFe-GA-CP                                              | CP        | 10                         | 185         | 28.74                               | This Work |
| Ni-BTC                                                  | CP        | 10                         | 346         | 64                                  | 12        |
| Ni <sub>0.55</sub> Fe <sub>0.45</sub> -poly(5Aphen)/CP  | CP        | 10                         | 264         |                                     | 13        |
| NiS@N/S-C                                               | CP        | 10                         | 417         | 48                                  | 14        |
| CNH-D-NiMOF                                             | CP        | 10                         | 320         | 85.3                                | 15        |
| Ni-doped CoS <sub>2</sub> /CFP                          | CFP       | 10                         | 270         | 79                                  | 16        |
| Zn-doped CoSe <sub>2</sub>                              | CP        | 10                         | 356         | 88                                  | 17        |
| NiFe NCs                                                | CP        | 10                         | 270         | 48                                  | 18        |
| NiFe <sub>x</sub> /NiFe <sub>2</sub> O <sub>4</sub> @NC | CP        | 10                         | 262         | 51.4                                | 19        |
| Ni-Cu@Cu-Ni MOF                                         | CP        | 10                         | 624         | 98                                  | 20        |
| (Fe <sub>0.5</sub> Ni <sub>0.5</sub> )S <sub>2</sub>    | CP        | 10                         | 241         | 51.8                                | 21        |
| CNH-D-NiMOF-400                                         | CP        | 20                         | 270         | 97.2                                | 15        |
|                                                         |           | 100                        | 340         |                                     |           |
| Ni-Co-S/CF                                              | CP        | 100                        | 360         | 109                                 | 22        |
| NiCo-LDH@FeOOH/CFP                                      | CFP       | 10                         | 224         | 38                                  | 23        |
| NiFeCH(Ce)                                              | CP        | 100                        | 252         | 59                                  | 24        |
| Co <sub>2</sub> Fe <sub>0.5</sub> V <sub>0.5</sub> LDH  | CP        | 10                         | 242         | 41.4                                | 25        |
| NC/Co/CoP/CP                                            | CP        | 10                         | 350         | 94                                  | 26        |
| N-CoSe <sub>2</sub> @CP                                 | CP        | 10                         | 273         | 74                                  | 27        |
| Co(OH) <sub>x</sub> /Ag/Co(OH) <sub>2</sub>             | CP        | 10                         | 283         | 97                                  | 28        |
| CuCo-MOF                                                | CP        | 10                         | 340         | 173.5                               | 29        |
| Ni-Cu@Cu-Ni-MOF                                         | CP        | 10                         | 624         | 98                                  | 20        |
| GNiPy350N                                               | CP        | 10                         | 320         | 52.2                                | 30        |
| NiCoP-CNT@NiCo/CP                                       | CP        | 10                         | 290         | 21                                  | 31        |
| NiCoFeP/C                                               | CP        | 10                         | 270         | 87                                  | 32        |
| Fe-Co-P                                                 | CP        | 10                         | 269         | 31                                  | 33        |
| Cu <sub>0.075</sub> Co <sub>0.925</sub> P/CP            | CP        | 10                         | 221         | 70.4                                | 34        |
| Co <sub>x</sub> Fe <sub>y</sub> N/graphene              | CP        | 10                         | 270         | 32                                  | 35        |
| MCCF/NiMn-MOF                                           | CP        | 10                         | 280         | 86                                  | 36        |

**Table S5.** Comparison of the OER performance among NiFe-GA-CP and other electrocatalysts on nickel foam (NF) at 10 mA·cm<sup>-2</sup>.

| Catalyst                                                     | Substrate | $j$ (mA·cm <sup>-2</sup> ) | $\eta$ (mV) | Tafel slope (mV·dec <sup>-1</sup> ) | Ref.      |
|--------------------------------------------------------------|-----------|----------------------------|-------------|-------------------------------------|-----------|
| NiFe-GA-CP                                                   | CP        | 10                         | 185         | 28.74                               | This Work |
| Mn-doped NiFe-LDH                                            | NF        | 10                         | 250         | 47                                  | 37        |
| CoFe LDHs-Ar                                                 | NF        | 10                         | 266         | 37.85                               | 38        |
| NiFe-LDH                                                     | NF        | 10                         | 210         | 40.4                                | 39        |
| NiFeRu-LDH                                                   | NF        | 10                         | 225         | 31                                  | 40        |
| NiFeMo                                                       | NF        | 10                         | 280         | 40                                  | 41        |
| Ni <sub>0.7</sub> Fe <sub>0.3</sub> S <sub>2</sub>           | NF        | 10                         | 198         | 56                                  | 42        |
| Ni <sub>0.65</sub> Ga <sub>0.30</sub> Fe <sub>0.05</sub> /NF | NF        | 10                         | 200         | 42                                  | 43        |
| NF-Na-Fe-Pt                                                  | NF        | 10                         | 261         | 39.68                               | 44        |
| a/c-NiFe-G                                                   | NF        | 10                         | 250         | 36.5                                | 45        |
| Ni <sub>1/2</sub> Fe <sub>1/2</sub> (OH) <sub>2</sub> /CNT   | NF        | 10                         | 244         | 41                                  | 46        |
| NiCoFe-PS nanorod/NF                                         | NF        | 10                         | 195         | 40.3                                | 47        |
| P-Ni <sub>0.75</sub> Fe <sub>0.25</sub> Se <sub>2</sub>      | NF        | 10                         | 156         | 19.5                                | 48        |
| CoMoNiS-NF-31                                                | NF        | 10                         | 166         | 58                                  | 49        |
| Ni-Fe-Se nanocages                                           | NF        | 10                         | 249         | 36                                  | 50        |
| NiFe-polydopamine film                                       | NF        | 10                         | 254.1       | 23.3                                | 51        |
| MCCF/NiMn-MOF                                                | NF        | 10                         | 195         | 44.1                                | 52        |

**Table S6.** Comparison of the OER performance among NiFe-GA-CP and other electrocatalysts at 100 mA cm<sup>-2</sup>.

| Catalyst                                                          | $j$ (mA·cm <sup>-2</sup> ) | $\eta$ (mV) | Stability (h) | Tafel slope (mV·dec <sup>-1</sup> ) | Ref.      |
|-------------------------------------------------------------------|----------------------------|-------------|---------------|-------------------------------------|-----------|
| NiFe-GA-CP                                                        | 100                        | 236         | 24            | 28.74                               | This Work |
| S-(Ni,Fe)OOH                                                      | 100                        | 281         | 100           | 48.9                                | 53        |
| Ta-NiFe LDH                                                       | 100                        | 280         | 20            | 58.95                               | 54        |
| NiMoFeO@NC                                                        | 100                        | 290         | 24            | 66.6                                | 55        |
| Ni <sub>0.75</sub> Fe <sub>0.25</sub> Se <sub>2</sub> by P doping | 100                        | 238         | 120           | 27.2                                | 56        |
| Ru <sub>1</sub> /D-NiFe LDH                                       | 100                        | 218         | 100           | 31                                  | 57        |
| Ni(OH) <sub>2</sub> /FeOOH                                        | 100                        | 247         | 110           | 27.7                                | 58        |
| (WO <sub>2</sub> -Na <sub>x</sub> WO <sub>3</sub> )@FeOOH/NF      | 100                        | 260         | 120           | 42.2                                | 59        |
| Ni(Fe)OOH-FeS <sub>x</sub>                                        | 100                        | 310         | 16            | 55                                  | 60        |
| FeNi(VO <sub>4</sub> ) <sub>x</sub> @NF                           | 100                        | 274         | 11            | 56.6                                | 61        |
| FeOOH/Co/FeOOH HNTAs-NF                                           | 100                        | 300         | 50            | 32                                  | 62        |
| Au/NiFe-LDH                                                       | 100                        | 240         | 20            | 40.4                                | 63        |
| Cu@NiFe LDH                                                       | 100                        | 281         | 48            | 27.8                                | 64        |
| Ni <sub>3</sub> Fe <sub>0.5</sub> V <sub>0.5</sub>                | 100                        | 264         | 60            | 39                                  | 65        |
| NiMoFeO@NC                                                        | 100                        | 290         | 24            | 66.6                                | 66        |

**Table S7.** XPS fitting results of NiFe-GA-CP before and after stability test.

|       |                | BE / eV           | BE /eV            | Valence                        |
|-------|----------------|-------------------|-------------------|--------------------------------|
|       |                | 2p <sub>3/2</sub> | 2p <sub>1/2</sub> |                                |
| Ni 2p | Before         | 856.2             | 873.7             |                                |
|       | After          | 854.8             | 872.2             | +2                             |
|       | stability test | 855.8             | 873.2             | +3                             |
| Fe 2p | Before         | 711.9             | 725.5             |                                |
|       | After          | 711.5             | 724.4             | +3                             |
|       | stability test |                   |                   |                                |
|       |                |                   |                   | Assignment                     |
| O 1s  | Before         | 531.4             |                   | M-O-R                          |
|       |                | 533.0             |                   | chemisorbed<br>molecular water |
|       | After          | 530.8             |                   | M-O-M                          |
|       | stability test | 531.5             |                   | M-O-R                          |

**Table S8.** Raman band assignments of NiFe-GA-CP, Ni-GA-CP, and Fe-GA-CP.

|            | Raman shift / cm <sup>-1</sup> | Assignment           | Ref.   |
|------------|--------------------------------|----------------------|--------|
| NiFe-GA-CP | 487                            | NiOOH / Fe-O         | 67, 68 |
|            | 591                            | FeOOH                | 69     |
|            | 707                            | FeOOH / NiO          | 70, 71 |
|            | 790                            | Ni-H                 | 72     |
|            | 1061                           | active oxygen / Ni-O | 71, 73 |
| Ni-GA-CP   | 487                            | NiOOH                | 67     |
|            | 601                            | Ni(OH) <sub>2</sub>  | 71     |
|            | 707                            | NiO                  | 71     |
|            | 783                            | Ni-H                 | 72     |
|            | 1061                           | Ni-O                 | 71     |
| Fe-GA-CP   | 486                            | Fe-O                 | 68     |
|            | 599                            | FeOOH                | 69     |
|            | 802                            | C-H                  | 74     |
|            | 1061                           | active oxygen        | 73     |

**Table S9.** DFT calculated free energy changes of each step in the OER process on Fe-GA, Ni-GA, and NiFe-GA.

| OER Descriptors           | Fe-GA    | Ni-GA   | NiFe-GA  |
|---------------------------|----------|---------|----------|
| $\Delta G^*$              | 0 eV     | 0 eV    | 0 eV     |
| $\Delta G^*_{\text{OH}}$  | -0.14 eV | 0.43 eV | -0.33 eV |
| $\Delta G^*_{\text{O}}$   | 1.57 eV  | 2.06 eV | -0.06 eV |
| $\Delta G^*_{\text{OOH}}$ | 0.58 eV  | 0.68 eV | 0.03 eV  |
| Overpotential             | 1.71 eV  | 1.63 eV | 0.27 eV  |

## References

1. J. Zhu, F. Chen, Z. Zhang, M. Li, Q. Yang, Y. Yang, Z. Bao and Q. Ren, *ACS Sustain. Chem. Eng.*, 2019, **7**, 12955-12963.
2. J. Wang, L. Li, L. Guo, Y. Zhao, D. Xie, Z. Zhang, Q. Yang, Y. Yang, Z. Bao and Q. Ren, *Chemistry*, 2019, **25**, 15516-15524.
3. R. K. Feller and A. K. Cheetham, *Solid State Sci.*, 2006, **8**, 1121-1125.
4. G. Kresse and J. Furthmüller, *Phys. Rev. B - Condens. Matter Mater. Phys.*, 1996, **54 (16)**, 11169–11186.
5. P. E. Blochl, *Rev. B - Condens. Matter Mater. Phys.*, 1994, **50**, 17953-17979.
6. D. Joubert, *Phys. Rev. B - Condens. Matter Mater. Phys.*, 1999, **59 (3)**, 1758–1775.
7. J. P. Perdew, K. Burke and M. Ernzerhof, *Phys. Rev. Lett.*, 1996, **77 (18)**, 3865–3868.
8. S. Grimme, J. Antony, S. Ehrlich and H. Krieg, *J. Chem. Phys.*, 2010, **132**, 154104.
9. S. Zhao, Y. Wang, J. Dong, C.-T. He, H. Yin, P. An, K. Zhao, X. Zhang, C. Gao, L. Zhang, J. Lv, J. Wang, J. Zhang, A. M. Khattak, N. A. Khan, Z. Wei, J. Zhang, S. Liu, H. Zhao and Z. Tang, *Nat. Energy.*, 2016, **1**, 16184.
10. J. K. Nørskov, J. Rossmeisl, A. Logadottir, L. Lindqvist, J. R. Kitchin, T. Bligaard and H. Jónsson, *J. Phys. Chem. B*, 2004, **108 (46)**, 17886–17892.
11. A. Sharma, A. Kumar, C. Li, P. Panwar Hazari, S. D. Mahajan, R. Aalinkeel, R. K. Sharma and M. T. Swihart, *J. Mater. Chem. B*, 2021, **9**, 2505-2514.
12. V. Maruthapandian, S. Kumaraguru, S. Mohan, V. Saraswathy and S. Muralidharan, *ChemElectroChem*, 2018, **5**, 2795-2807.
13. Z. Zhou, Q. Tian, L. Chai, P. Chao, S. Liu and C. Wang, *J. Power Sources*, 2021, **506**, 230109.
14. L. Yang, M. Gao, B. Dai, X. Guo, Z. Liu and B. Peng, *Electrochim. Acta*, 2016, **191**, 813-820.
15. Y. Guo, Y. Zhou, Y. Nan, B. Li and X. Song, *ACS Appl. Mater. Interfaces*, 2020, **12**, 12743-12754.
16. Z. Xie, H. Tang and Y. Wang, *ChemElectroChem*, 2019, **6**, 1206-1212.
17. Q. Dong, Q. Wang, Z. Dai, H. Qiu and X. Dong, *ACS Appl. Mater. Interfaces*, 2016, **8**, 26902-26907.
18. A. Kumar and S. Bhattacharyya, *ACS Appl. Mater. Interfaces*, 2017, **9**, 41906-41915.
19. J. Zhao, X. Zhang, M. Liu, Y.-Z. Jiang, M. Wang, Z.-Y. Li and Z. Zhou, *J. Mater. Chem. A*, 2019, **7**, 21338-21348.
20. X. Ma, K. Qi, S. Wei, L. Zhang and X. Cui, *J. Alloys Compd.*, 2019, **770**, 236-242.
21. W. Dai, Y. Pan, K. Ren, Y.-a. Zhu and T. Lu, *Electrochim. Acta*, 2020, **355**, 136821.
22. T. Liu, X. Sun, A. M. Asiri and Y. He, *Int. J. Hydrog. Energy*, 2016, **41**, 7264-7269.

23. X. Han, Y. Niu, C. Yu, Z. Liu, H. Huang, H. Huang, S. Li, W. Guo, X. Tan and J. Qiu, *Nano Energy*, 2020, **69**, 104367.
24. J. Cai, J. Huang, S. Xu, L. Yuan, X. Huang, Z. Huang and C. Zhang, *J. Solid State Electro.*, 2019, **23**, 3449-3458.
25. Y. Yang, Y. Ou, Y. Yang, X. Wei, D. Gao, L. Yang, Y. Xiong, H. Dong, P. Xiao and Y. Zhang, *Nanoscale*, 2019, **11**, 23296-23303.
26. M. Cong, D. Sun, L. Zhang and X. Ding, *Chinese J. Catal.*, 2020, **41**, 242-248.
27. G. Wei, Z. Xu, X. Zhao, S. Wang, F. Kong and C. An, *J. Alloys Compd.*, 2022, **893**, 162328.
28. W. Guo, J. Kim, H. Kim, G. H. Han, H. W. Jang, S. Y. Kim and S. H. Ahn, *J. Alloys Compd.*, 2022, **889**, 161674.
29. Q. Liu, J. Chen, F. Yu, J. Wu, Z. Liu and B. Peng, *New. J. Chem.*, 2021, **45**, 16714-16721.
30. A. S. Souza, L. S. Bezerra, E. S. F. Cardoso, G. V. Fortunato and G. Maia, *J. Mater. Chem. A*, 2021, **9**, 11255-11267.
31. Z. Wang, C. Wei, X. Zhu, X. Wang, J. He and Y. Zhao, *J. Mater. Chem. A*, 2021, **9**, 1150-1158.
32. X. Wei, Y. Zhang, H. He, L. Peng, S. Xiao, S. Yao and P. Xiao, *Chem. Commun.*, 2019, **55**, 10896-10899.
33. H. Zhang, W. Zhou, J. Dong, X. F. Lu and X. W. Lou, *Energy Environ. Sci.*, 2019, **12**, 3348-3355.
34. L. Yan, B. Zhang, J. Zhu, S. Zhao, Y. Li, B. Zhang, J. Jiang, X. Ji, H. Zhang and P. K. Shen, *J. Mater. Chem. A*, 2019, **7**, 14271-14279.
35. H. Liu, X. Lu, Y. Hu, R. Chen, P. Zhao, L. Wang, G. Zhu, L. Ma and Z. Jin, *J. Mater. Chem. A*, 2019, **7**, 12489-12497.
36. W. Cheng, X. F. Lu, D. Luan and X. W. D. Lou, *Angew. Chem. Int. Ed.*, 2020, **59**, 18234-18239.
37. Z. Lu, L. Qian, Y. Tian, Y. Li, X. Sun and X. Duan, *Chem. Commun.*, 2016, **52**, 908-911.
38. Y. Wang, Y. Zhang, Z. Liu, C. Xie, S. Feng, D. Liu, M. Shao and S. Wang, *Angew. Chem. Int. Ed.*, 2017, **56**, 5867-5871.
39. X. Yang, C.-J. Wang, C.-C. Hou, W.-F. Fu and Y. Chen, *ACS Sustain. Chem. Eng.*, 2018, **6**, 2893-2897.
40. G. Chen, T. Wang, J. Zhang, P. Liu, H. Sun, X. Zhuang, M. Chen and X. Feng, *Adv. Mater.*, 2018, **30**, 1706279.
41. N. Han, F. Zhao and Y. Li, *J. Mater. Chem. A*, 2015, **3**, 16348-16353.
42. J. Yu, G. Cheng and W. Luo, *J. Mater. Chem. A*, 2017, **5**, 15838-15844.
43. S. F. Zai, A. Q. Dong, J. Li, Z. Wen, C. C. Yang and Q. Jiang, *J. Mater. Chem. A*, 2021, **9**, 6223-6231.
44. Y. Zhao, Y. Gao, Z. Chen, Z. Li, T. Ma, Z. Wu and L. Wang, *Appl. Catal. B*, 2021, **297**, 120395.
45. Z. Gong, R. Liu, H. Gong, G. Ye, J. Liu, J. Dong, J. Liao, M. Yan, J. Liu, K. Huang, L. Xing, J. Liang, Y. He and H. Fei, *ACS Catal.*, 2021, **11**, 12284-12292.
46. J. Ge, J. Y. Zheng, J. Zhang, S. Jiang, L. Zhang, H. Wan, L. Wang, W. Ma, Z. Zhou and R. Ma, *J. Mater. Chem. A*, 2021, **9**, 14432-14443.
47. M. Yao, H. Hu, B. Sun, N. Wang, W. Hu and S. Komarneni, *Small*, 2019, **15**, 1905201.

48. Y. Huang, L.-W. Jiang, X.-L. Liu, T. Tan, H. Liu and J.-J. Wang, *Appl. Catal. B*, 2021, **299**, 120678.
49. Y. Yang, H. Yao, Z. Yu, S. M. Islam, H. He, M. Yuan, Y. Yue, K. Xu, W. Hao, G. Sun, H. Li, S. Ma, P. Zapol and M. G. Kanatzidis, *J. Am. Chem. Soc.*, 2019, **141**, 10417-10430.
50. Z. P. Wu, H. Zhang, S. Zuo, Y. Wang, S. L. Zhang, J. Zhang, S. Q. Zang and X. W. D. Lou, *Adv. Mater.*, 2021, **33**, 2103004.
51. L. Zhang, W. Tang, C. Dong, D. Zhou, X. Xing, W. Dong, Y. Ding, G. Wang and M. Wu, *Appl. Catal. B*, 2021, 120833.
52. J. Liang, X. Gao, B. Guo, Y. Ding, J. Yan, Z. Guo, E. C. M. Tse and J. Liu, *Angew. Chem. Int. Ed.*, 2021, **60**, 12770-12774.
53. L. Yu, L. Wu, B. McElhenny, S. Song, D. Luo, F. Zhang, Y. Yu, S. Chen and Z. Ren, *Energy Environ. Sci.*, 2020, **13**, 3439-3446.
54. X. Wang, Y. Tuo, Y. Zhou, D. Wang, S. Wang and J. Zhang, *Chem. Eng. J.*, 2021, **403**, 126297.
55. Y. Wang, Y. Zhu, S. Zhao, S. She, F. Zhang, Y. Chen, T. Williams, T. Gengenbach, L. Zu, H. Mao, W. Zhou, Z. Shao, H. Wang, J. Tang, D. Zhao and C. Selomulya, *Matter*, 2020, **3**, 2124-2137.
56. Y. Huang, L. W. Jiang, B. Y. Shi, K. M. Ryan and J. J. Wang, *Adv. Sci.*, 2021, 2101775.
57. P. Zhai, M. Xia, Y. Wu, G. Zhang, J. Gao, B. Zhang, S. Cao, Y. Zhang, Z. Li, Z. Fan, C. Wang, X. Zhang, J. T. Miller, L. Sun and J. Hou, *Nat. Commun.*, 2021, **12**, 4587.
58. H. Liao, T. Luo, P. Tan, K. Chen, L. Lu, Y. Liu, M. Liu and J. Pan, *Adv. Funct. Mater.*, 2021, 202102772.
59. J. Liu, G. Qian, H. Zhang, J. Chen, Y. Wang, H. He, L. Luo and S. Yin, *Chem. Eng. J.*, 2021, **426**, 131253.
60. H. Yang, L. Gong, H. Wang, C. Dong, J. Wang, K. Qi, H. Liu, X. Guo and B. Y. Xia, *Nat. Commun.*, 2020, **11**, 5075.
61. K. Dastafkan, Q. Meyer, X. Chen and C. Zhao, *Small*, 2020, **16**, 2002412.
62. J. X. Feng, H. Xu, Y. T. Dong, S. H. Ye, Y. X. Tong and G. R. Li, *Angew. Chem. Int. Ed.*, 2016, **55**, 3694-3698.
63. J. Zhang, J. Liu, L. Xi, Y. Yu, N. Chen, S. Sun, W. Wang, K. M. Lange and B. Zhang, *J. Am. Chem. Soc.*, 2018, **140**, 3876-3879.
64. L. Yu, H. Zhou, J. Sun, F. Qin, F. Yu, J. Bao, Y. Yu, S. Chen and Z. Ren, *Energy Environ. Sci.*, 2017, **10**, 1820-1827.
65. J. Jiang, F. Sun, S. Zhou, W. Hu, H. Zhang, J. Dong, Z. Jiang, J. Zhao, J. Li, W. Yan and M. Wang, *Nat. Commun.*, 2018, **9**, 2885.
66. Q. Che, Q. Li, X. Chen, Y. Tan and X. Xu, *Appl. Catal. B*, 2020, **263**, 118338.
67. D. Zhou, S. Wang, Y. Jia, X. Xiong, H. Yang, S. Liu, J. Tang, J. Zhang, D. Liu, L. Zheng, Y. Kuang, X. Sun and B. Liu, *Angew. Chem. Int. Ed.*, 2019, **58**, 736-740.
68. M. Legodi and D. Dewaal, *Dyes Pigm.*, 2007, **74**, 161-168.
69. K. Hedenstedt, J. Bäckström and E. Ahlberg, *J. Electrochem. Soc.*, 2017, **164**, 621-627.
70. L. Bai, S. Lee and X. Hu, *Angew. Chem. Int. Ed.*, 2021, **60**, 3095-3103.
71. W. Lai, L. Ge, H. Li, Y. Deng, B. Xu, B. Ouyang and E. Kan, *Int. J. Hydrog. Energy*, 2021, **46**, 26861-26872.

72. A. Y. Faid, A. O. Barnett, F. Seland and S. Sunde, *Electrochim. Acta*, 2020, **361**, 137040.
73. K. Wang, H. Du, S. He, L. Liu, K. Yang, J. Sun, Y. Liu, Z. Du, L. Xie, W. Ai and W. Huang, *Adv. Mater.*, 2021, **33**, 2005587.
74. K. C. Le, J. Henriksson and P. E. Bengtsson, *J Raman Spectrosc*, 2021, **52**, 1115-1122.
